# Supplementary material for: Efficacy and Safety of Pertuzumab and Trastuzumab Administered in a Single Infusion Bag, Followed by Vinorelbine: VELVET Cohort 2 Final Results
Source: PubMed Central journal article supplement — Oncologist. 2017 Jun 7;22(10):1160–8. doi: 10.1634/theoncologist.2017-0079 (PMC5634765; doi:10.1634/theoncologist.2017-0079), 2017-06-07
Supplement: supp_the2017-0079_onco12171-sup-0001-suppinfo01.pdf [file supp_the2017-0079_onco12171-sup-0001-suppinfo01.pdf]

Supplemental Figures for:  
Efficacy and Safety of Pertuzumab and Trastuzumab Administered in a Single Infusion Bag, Followed by Vinorelbine: VELVET Cohort 2 Final Results  
Michael Andersson et al.

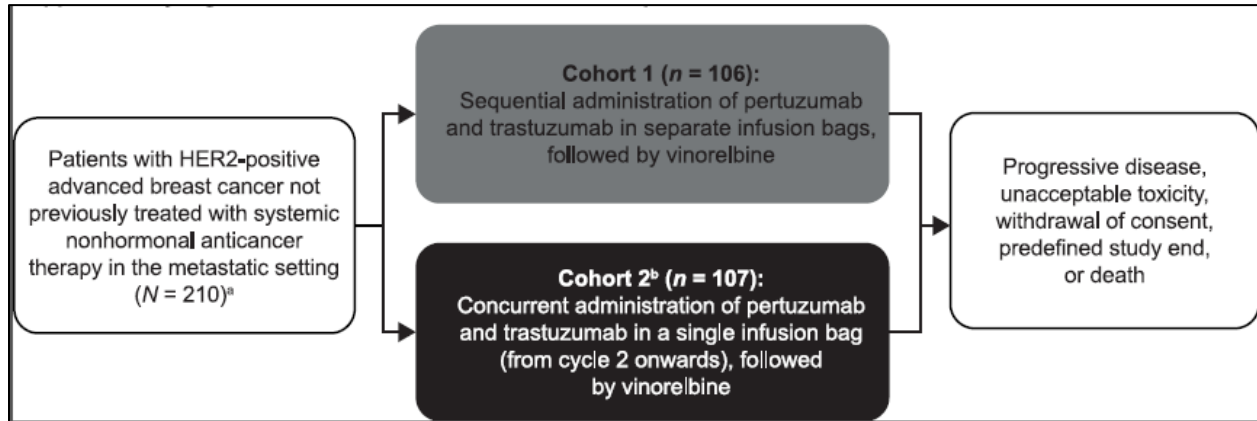

**Figure S1.** VELVET study design. Reprinted from Perez EA, López-Vega JM, Petit T et al. Safety and efficacy of vinorelbine in combination with pertuzumab and trastuzumab for first-line treatment of patients with HER2-positive locally advanced or metastatic breast cancer: VELVET Cohort 1 final results. *Breast Cancer Res* 2016;18:126 under the terms of the Creative Commons Attribution 4.0 International License (<https://creativecommons.org/licenses/by/4.0/>).

<sup>a</sup>Sample size was based on assuming a best overall response of 70–80% in each cohort.

<sup>b</sup>Recruitment into Cohort 2 began after Cohort 1 had finished enrolling patients.

Abbreviation: HER2, human epidermal growth factor receptor 2.

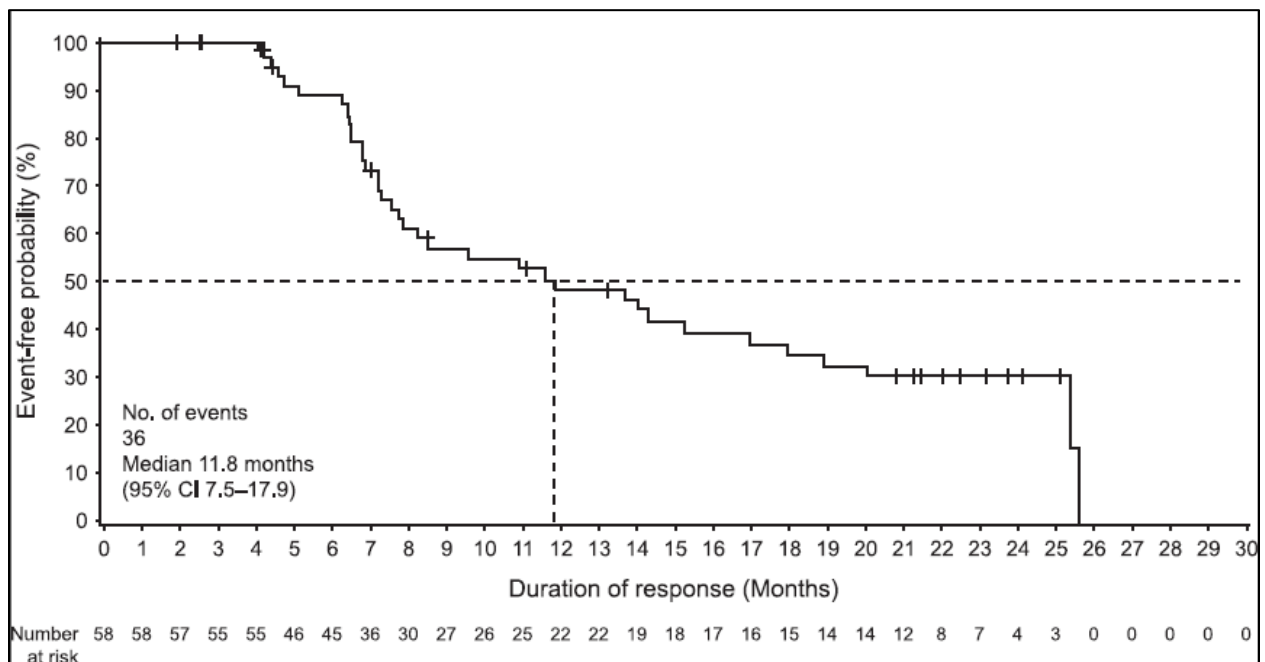

**Figure S2.** Investigator-assessed duration of response in responders (intent-to-treat population)  
Abbreviation: CI, confidence interval.
