# Supplementary material for: Efficacy and Safety of Pertuzumab and Trastuzumab Administered in a Single Infusion Bag, Followed by Vinorelbine: VELVET Cohort 2 Final Results
Source: PubMed Central journal article supplement — Oncologist. 2017 Jun 7;22(10):1160–8. doi: 10.1634/theoncologist.2017-0079 (PMC5634765; doi:10.1634/theoncologist.2017-0079), 2017-06-07
Supplement: supp_the2017-0079_onco12171-sup-0002-suppinfo02.pdf [file supp_the2017-0079_onco12171-sup-0002-suppinfo02.pdf]

Supplemental Tables for:  
Efficacy and Safety of Pertuzumab and Trastuzumab Administered in a Single Infusion Bag, Followed by Vinorelbine: VELVET Cohort 2 Final Results  
Michael Andersson et al.

**Table S1.** Worst LVEF values while on treatment (safety population)

| LVEF values                                               | Cohort 2: Pertuzumab and trastuzumab followed by<br>vinorelbine<br><i>N</i> = 107 |
|-----------------------------------------------------------|-----------------------------------------------------------------------------------|
| LVEF >50%                                                 | 98 (91.6)                                                                         |
| LVEF decline of ≥10% from baseline to 45–50% <sup>a</sup> | 4 (3.7)                                                                           |
| LVEF decline to <45%                                      | 2 (1.9)                                                                           |

Data are presented as *n* (%).

<sup>a</sup>One patient experienced an LVEF of 45–50% but no decline from baseline data was available due to differing scans being used; ECHO at baseline and MUGA thereafter.

Abbreviations: ECHO, echocardiography; LVEF, left ventricular ejection fraction; MUGA, multigated acquisition.

**Table S2.** Anticancer treatments received by patients after discontinuing study treatment (safety population)

| INN class/preferred term <sup>a</sup>        | Cohort 2: Pertuzumab and<br>trastuzumab followed by<br>vinorelbine<br><i>N</i> = 107 <sup>b</sup><br><i>n</i> = 76 <sup>c</sup> |
|----------------------------------------------|---------------------------------------------------------------------------------------------------------------------------------|
| <b>HER2-targeted treatment<sup>d,e</sup></b> |                                                                                                                                 |
| Patients who received any treatment          | 62 (81.6)                                                                                                                       |
| ARRY-380                                     | 1 (1.3)                                                                                                                         |
| Lapatinib                                    | 17 (22.4)                                                                                                                       |
| Pertuzumab                                   | 20 (26.3)                                                                                                                       |
| Trastuzumab                                  | 45 (59.2)                                                                                                                       |
| Ado-trastuzumab emtansine                    | 16 (21.1)                                                                                                                       |
| <b>Alkylating agents</b>                     |                                                                                                                                 |
| Patients who received any treatment          | 5 (6.6)                                                                                                                         |
| Cyclophosphamide                             | 5 (6.6)                                                                                                                         |
| <b>Angiogenesis inhibitors</b>               |                                                                                                                                 |
| Patients who received any treatment          | 2 (2.6)                                                                                                                         |
| Bevacizumab                                  | 2 (2.6)                                                                                                                         |
| <b>Anti-estrogens</b>                        |                                                                                                                                 |
| Patients who received any treatment          | 5 (6.6)                                                                                                                         |
| Fulvestrant                                  | 3 (3.9)                                                                                                                         |
| Tamoxifen                                    | 2 (2.6)                                                                                                                         |
| <b>Antimetabolites</b>                       |                                                                                                                                 |
| Patients who received any treatment          | 18 (23.7)                                                                                                                       |
| Capecitabine                                 | 17 (22.4)                                                                                                                       |
| Gemcitabine                                  | 3 (3.9)                                                                                                                         |
| <b>Antineoplastic agents<sup>f</sup></b>     |                                                                                                                                 |
| Patients who received any treatment          | 17 (22.4)                                                                                                                       |
| ARRY-380                                     | 1 (1.3)                                                                                                                         |
| Eribulin                                     | 2 (2.6)                                                                                                                         |
| Ado-trastuzumab emtansine                    | 16 (21.1)                                                                                                                       |
| <b>Aromatase inhibitors</b>                  |                                                                                                                                 |
| Patients who received any treatment          | 15 (19.7)                                                                                                                       |
| Anastrozole                                  | 2 (2.6)                                                                                                                         |
| Exemestane                                   | 5 (6.6)                                                                                                                         |
| Letrozole                                    | 8 (10.5)                                                                                                                        |

Supplemental Tables for:  
Efficacy and Safety of Pertuzumab and Trastuzumab Administered in a Single Infusion Bag, Followed by  
Vinorelbine: VELVET Cohort 2 Final Results  
Michael Andersson et al.

|                                        |           |
|----------------------------------------|-----------|
| <b>Cytotoxic antibiotics</b>           |           |
| Patients who received any treatment    | 7 (9.2)   |
| Doxorubicin                            | 7 (9.2)   |
| <b>Gonadotrophin and analogs</b>       |           |
| Patients who received any treatment    | 1 (1.3)   |
| Leuprorelin                            | 1 (1.3)   |
| <b>Immunosuppressants</b>              |           |
| Patients who received any treatment    | 1 (1.3)   |
| Everolimus                             | 1 (1.3)   |
| <b>Monoclonal antibodies</b>           |           |
| Patients who received any treatment    | 47 (61.8) |
| Denosumab                              | 2 (2.6)   |
| Pertuzumab                             | 20 (26.3) |
| Trastuzumab                            | 45 (59.2) |
| <b>Penicillins</b>                     |           |
| Patients who received any treatment    | 1 (1.3)   |
| Dicloxacillin                          | 1 (1.3)   |
| <b>Platinum compounds</b>              |           |
| Patients who received any treatment    | 4 (5.3)   |
| Carboplatin                            | 3 (3.9)   |
| Cisplatin                              | 1 (1.3)   |
| <b>Surgical and medical procedures</b> |           |
| Patients who received any treatment    | 13 (17.1) |
| Modified radical mastectomy            | 1 (1.3)   |
| Radiotherapy                           | 8 (10.5)  |
| Radiotherapy to bone                   | 1 (1.3)   |
| Radiotherapy to brain                  | 2 (2.6)   |
| Radiotherapy to breast                 | 1 (1.3)   |
| <b>Taxanes</b>                         |           |
| Patients who received any treatment    | 26 (34.2) |
| Docetaxel                              | 8 (10.5)  |
| Nanoparticle paclitaxel                | 2 (2.6)   |
| Paclitaxel                             | 16 (21.1) |
| <b>Tyrosine kinase inhibitors</b>      |           |
| Patients who received any treatment    | 18 (23.7) |
| Imatinib                               | 1 (1.3)   |
| Lapatinib                              | 17 (22.4) |
| <b>Vinca alkaloids</b>                 |           |
| Patients who received any treatment    | 7 (9.2)   |
| Vinorelbine <sup>b</sup>               | 7 (9.2)   |
| <b>Combinations<sup>d</sup></b>        |           |
| Patients who received any treatment    | 6 (7.9)   |
| Dicloxacillin/doxorubicin              | 1 (1.3)   |
| Bevacizumab/paclitaxel                 | 1 (1.3)   |
| Capecitabine/lapatinib                 | 1 (1.3)   |
| Cyclophosphamide/doxorubicin           | 1 (1.3)   |
| Everolimus/exemestane                  | 1 (1.3)   |
| Pertuzumab/trastuzumab                 | 1 (1.3)   |

Data are presented as *n* (%).

<sup>a</sup>INN classes are presented alphabetically and preferred terms are sorted within INN classes alphabetically.

Supplemental Tables for:  
Efficacy and Safety of Pertuzumab and Trastuzumab Administered in a Single Infusion Bag, Followed by  
Vinorelbine: VELVET Cohort 2 Final Results  
Michael Andersson et al.

<sup>b</sup>Number of patients in the safety population.

<sup>c</sup>Number of patients who received  $\geq 1$  anticancer treatment after discontinuing study treatment. Percentages are based on *n*. Patients may have received more than one anticancer treatment after discontinuing study treatment. Some therapies began before the last study treatment was received.

<sup>d</sup>All preferred terms within the “HER2-targeted treatment” and “Combinations” summaries are also included in their respective INN classes.

<sup>e</sup>The “HER2-targeted treatment” summary is a reclassification of specific preferred terms, identified by the medical team.

<sup>f</sup>The “Antineoplastic agents” summary includes any drug used to treat cancers that cannot be assigned to a more specific pharmacological class.

<sup>g</sup>Seven patients had vinorelbine reintroduced after study treatment was discontinued: two patients who had stopped study treatment due to an adverse event/unacceptable toxicity, two patients who had stopped study treatment due to an investigator decision, two patients who had stopped study treatment due to disease progression, and one patient who had stopped study treatment for administrative/other reasons.

Abbreviations: HER2, human epidermal growth factor receptor 2; INN, international nonproprietary name.
